# Supplementary material for: Origin of enantioselectivity in palladium-catalyzed asymmetric allylic alkylation reactions using chiral N,N-ligands with different rigidity and flexibility
Source: Royal Society of Chemistry journal article supplement (doi:10.1039/b618347f), 2007-01-01
Supplement: b618347f.pdf [file b618347f.pdf]

# SUPPORTING INFORMATION

## *Origin of Enantioselectivity in Palladium-Catalyzed Asymmetric Allylic Alkylation Reactions Using Chiral N,N-Ligands with Different Rigidity and Flexibility*

Dario Drommi,<sup>‡\*</sup> Maria Saporita,<sup>‡</sup> Giuseppe Bruno,<sup>‡</sup> Felice Faraone,<sup>‡\*</sup>  
Patrizia Scafato,<sup>†</sup> Carlo Rosini<sup>†</sup>

<sup>‡</sup>*Dipartimento di Chimica Inorganica, Chimica Analitica, Chimica Fisica dell'Università di Messina, Salita Sperone 31, Vill. S. Agata, 98166 Messina, Italy.*

<sup>†</sup>*Dipartimento di Chimica dell'Università della Basilicata, 85100 Potenza, Italy.*

*e-mail: [faraone@chem.unime.it](mailto:faraone@chem.unime.it)*

Contents:

|                        |    |
|------------------------|----|
| Table 1 DFT data ..... | S2 |
| NMR spectra .....      | S5 |

**Table 1. Computed (DFT)distances (Å), angles (°) absolute (hartree) and relative energies (kcal and kj mol<sup>-1</sup>) of 9 - 11 complexes**

| Complex | Conf | Pd-C1           | Pd-C2  | Pd-C3   | Pd-N1  | Pd-N2  | N1-C4  | N1-C5  | N1-C6  | N1-Pd-N2 | N1-Pd-C1 | N2-Pd-C3 | C1-Pd-C3 |
|---------|------|-----------------|--------|---------|--------|--------|--------|--------|--------|----------|----------|----------|----------|
| 9       | ENSS | 2.2476          | 2.2041 | 2.2203  | 2.2245 | 2.1358 | 1.5221 | 1.5299 | 1.5072 | 79.21    | 108.08   | 105.60   | 66.69    |
| 9       | EXSS | 2.2717          | 2.2038 | 2.2035  | 2.2265 | 2.1382 | 1.5206 | 1.5302 | 1.5081 | 78.58    | 108.06   | 105.40   | 66.44    |
| 9       | EXAS | 2.2412          | 2.1825 | 2.2390  | 2.2157 | 2.1320 | 1.5221 | 1.5301 | 1.5085 | 79.33    | 106.51   | 105.24   | 68.65    |
| 9       | ENAS | 2.2523          | 2.1802 | 2.2184  | 2.2218 | 2.1485 | 1.5232 | 1.5313 | 1.5044 | 79.30    | 107.26   | 106.17   | 67.61    |
| 9       | EXSA | 2.2787          | 2.1851 | 2.1914  | 2.2291 | 2.1359 | 1.5202 | 1.5293 | 1.5092 | 78.32    | 108.47   | 104.97   | 67.43    |
| 9       | EXAA | 2.2355          | 2.1563 | 2.2244  | 2.2131 | 2.1250 | 1.5250 | 1.5308 | 1.5089 | 79.49    | 104.86   | 105.33   | 70.21    |
| 10SS    | ENSS | 2.2710          | 2.2026 | 2.2283  | 2.2569 | 2.1300 | 1.5525 | 1.5318 | 1.5033 | 79.97    | 110.12   | 103.59   | 66.19    |
| 10SS    | EXSS | 2.2986          | 2.2142 | 2.2068  | 2.2625 | 2.1287 | 1.5524 | 1.5325 | 1.5035 | 79.67    | 109.88   | 103.40   | 66.00    |
| 10SS    | EXAS | 2.2314          | 2.1781 | 2.2662  | 2.2413 | 2.1222 | 1.5441 | 1.5303 | 1.5039 | 80.36    | 106.68   | 104.44   | 67.86    |
| 10SS    | ENSA | 2.2733          | 2.1766 | 2.2888  | 2.2827 | 2.1419 | 1.5534 | 1.5417 | 1.5026 | 79.54    | 110.89   | 103.22   | 66.24    |
| 10SS    | EXAA | 2.2532          | 2.1584 | 2.2251  | 2.2457 | 2.1168 | 1.5447 | 1.5308 | 1.5049 | 80.15    | 107.06   | 102.77   | 69.75    |
| 11SS    | ENSS | 2.2904          | 2.2073 | 2.2230  | 2.2548 | 2.1083 | 1.5712 | 1.5599 | 1.4776 | 80.64    | 108.78   | 104.50   | 65.95    |
| 11SS    | EXSS | 2.2917          | 2.2156 | 2.2131  | 2.2593 | 2.1061 | 1.5708 | 1.5626 | 1.4776 | 80.63    | 108.30   | 104.19   | 65.98    |
| 11SS    | EXAS | 2.2511          | 2.1798 | 2.2600  | 2.2501 | 2.0998 | 1.5827 | 1.5490 | 1.4766 | 80.85    | 106.40   | 104.65   | 67.75    |
| 11SS    | ENSA | 2.2999          | 2.1850 | 2.1914  | 2.2502 | 2.1099 | 1.5773 | 1.5563 | 1.4762 | 80.74    | 109.34   | 103.35   | 67.13    |
| 11SS    | EXAA | 2.2873          | 2.1609 | 2.2096  | 2.2470 | 2.0988 | 1.5809 | 1.5525 | 1.4761 | 80.94    | 106.70   | 103.01   | 69.39    |
| Complex | Conf | E(au) B3LYP/SDD |        | E(kcal) | E(kJ)  |        |        |        |        |          |          |          |          |
| 9       | ENSS | -1589.46464     |        | 0       | 0      |        |        |        |        |          |          |          |          |
| 9       | EXSS | -1589.46252     |        | 1.33    | 5.56   |        |        |        |        |          |          |          |          |
| 9       | EXAS | -1589.45646     |        | 5.13    | 21.46  |        |        |        |        |          |          |          |          |
| 9       | ENSA | -1589.45440     |        | 6.43    | 26.90  |        |        |        |        |          |          |          |          |
| 9       | EXSA | -1589.45313     |        | 7.22    | 30.22  |        |        |        |        |          |          |          |          |
| 9       | EXAA | -1589.44127     |        | 14.66   | 61.34  |        |        |        |        |          |          |          |          |
| 10SS    | ENSS | -1284.65125     |        | 0       | 0      |        |        |        |        |          |          |          |          |
| 10SS    | EXSS | -1284.65005     |        | 0.75    | 3.15   |        |        |        |        |          |          |          |          |

| Complex | Conf | E(au) B3LYP/SDD | E(kcal) | E(kJ) |
|---------|------|-----------------|---------|-------|
| 10SS    | EXAS | -1284.64517     | 3.82    | 15.96 |
| 10SS    | ENSA | -1284.63210     | 12.02   | 50.28 |
| 10SS    | EXAA | -1284.63001     | 13.33   | 55.77 |
| 11SS    | ENSS | -1398.95982     | 0       | 0     |
| 11SS    | EXSS | -1398.95909     | 0.46    | 1.91  |
| 11SS    | EXAS | -1398.95257     | 4.55    | 19.03 |
| 11SS    | ENSA | -1398.95072     | 5.15    | 21.53 |
| 11SS    | EXAA | -1398.93579     | 15.08   | 63.09 |

**SS = carbon ligand configuration ; EN=endo; EX=exo, AA=anti-anti, SS=syn-syn, AS=anti-syn, SA=syn-anti**

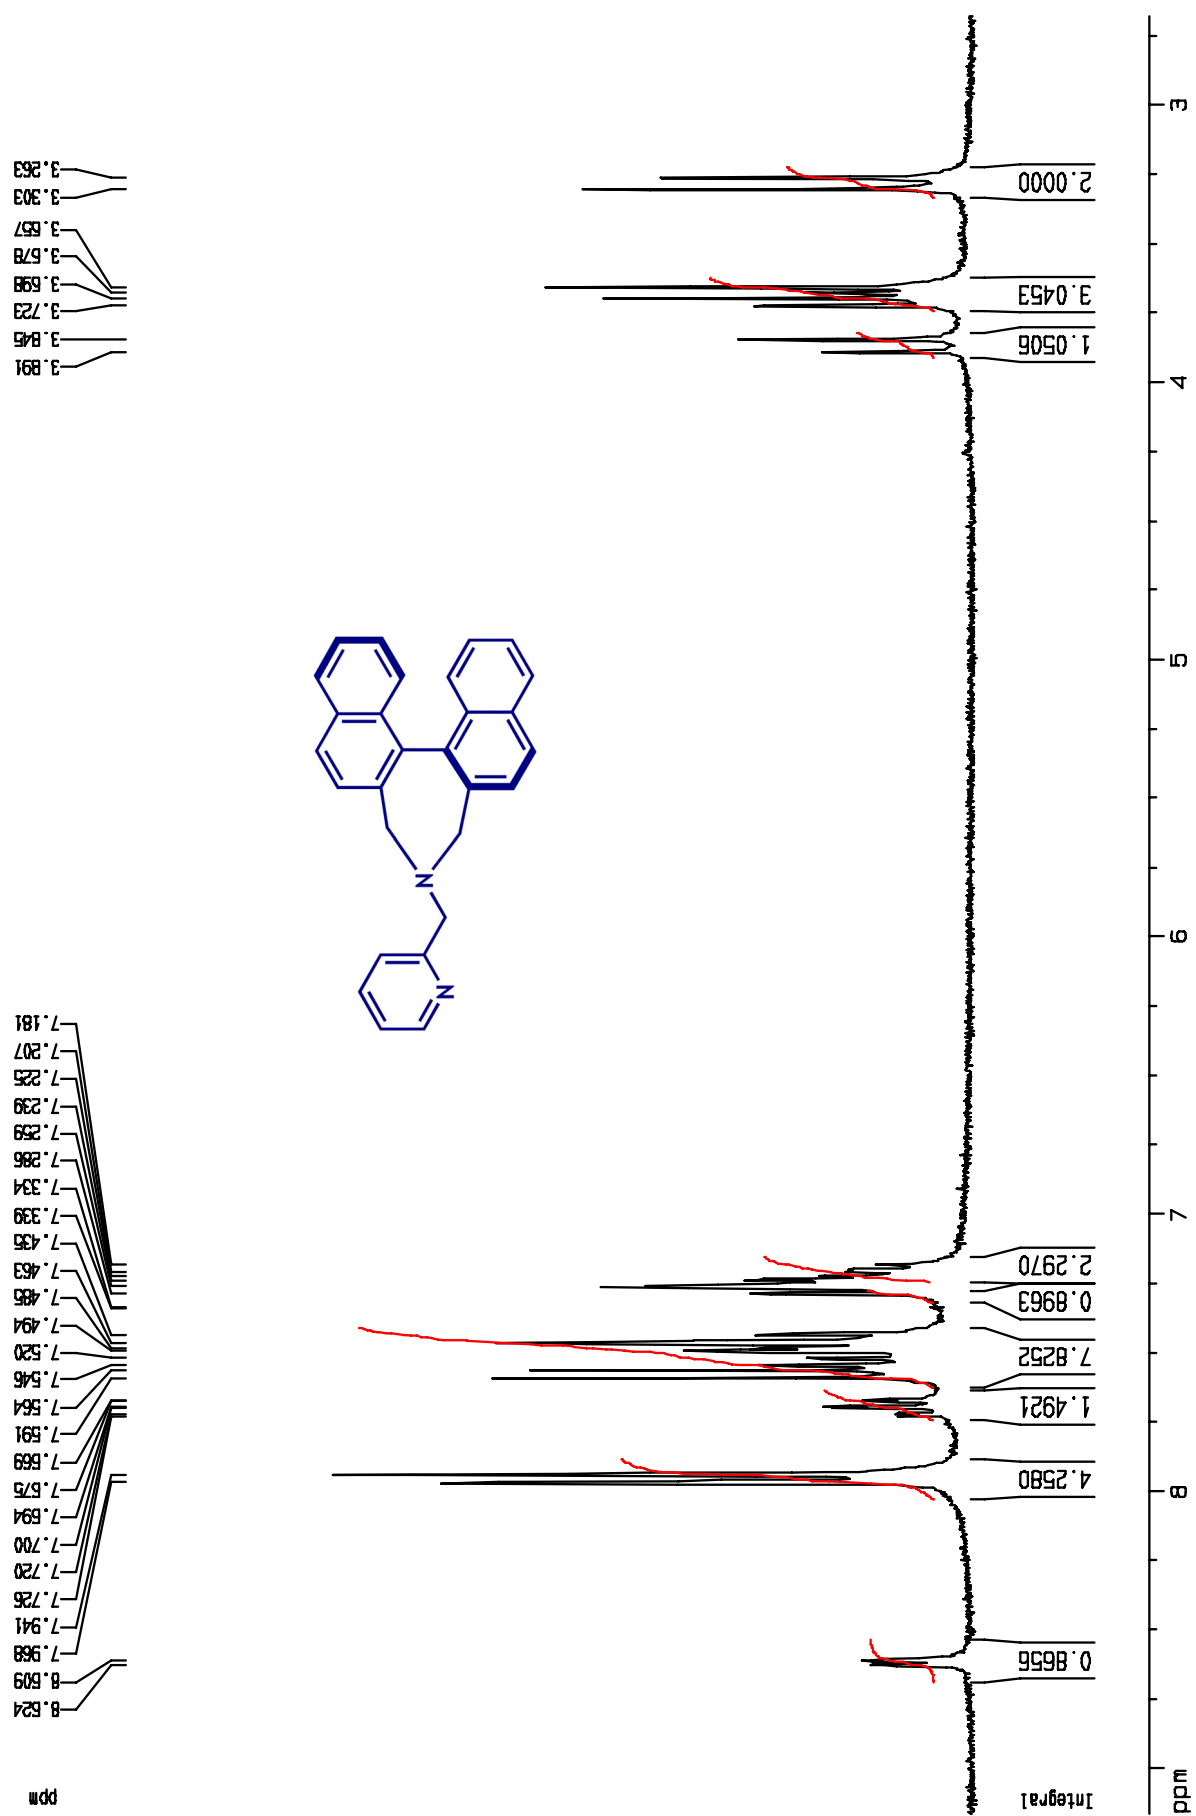

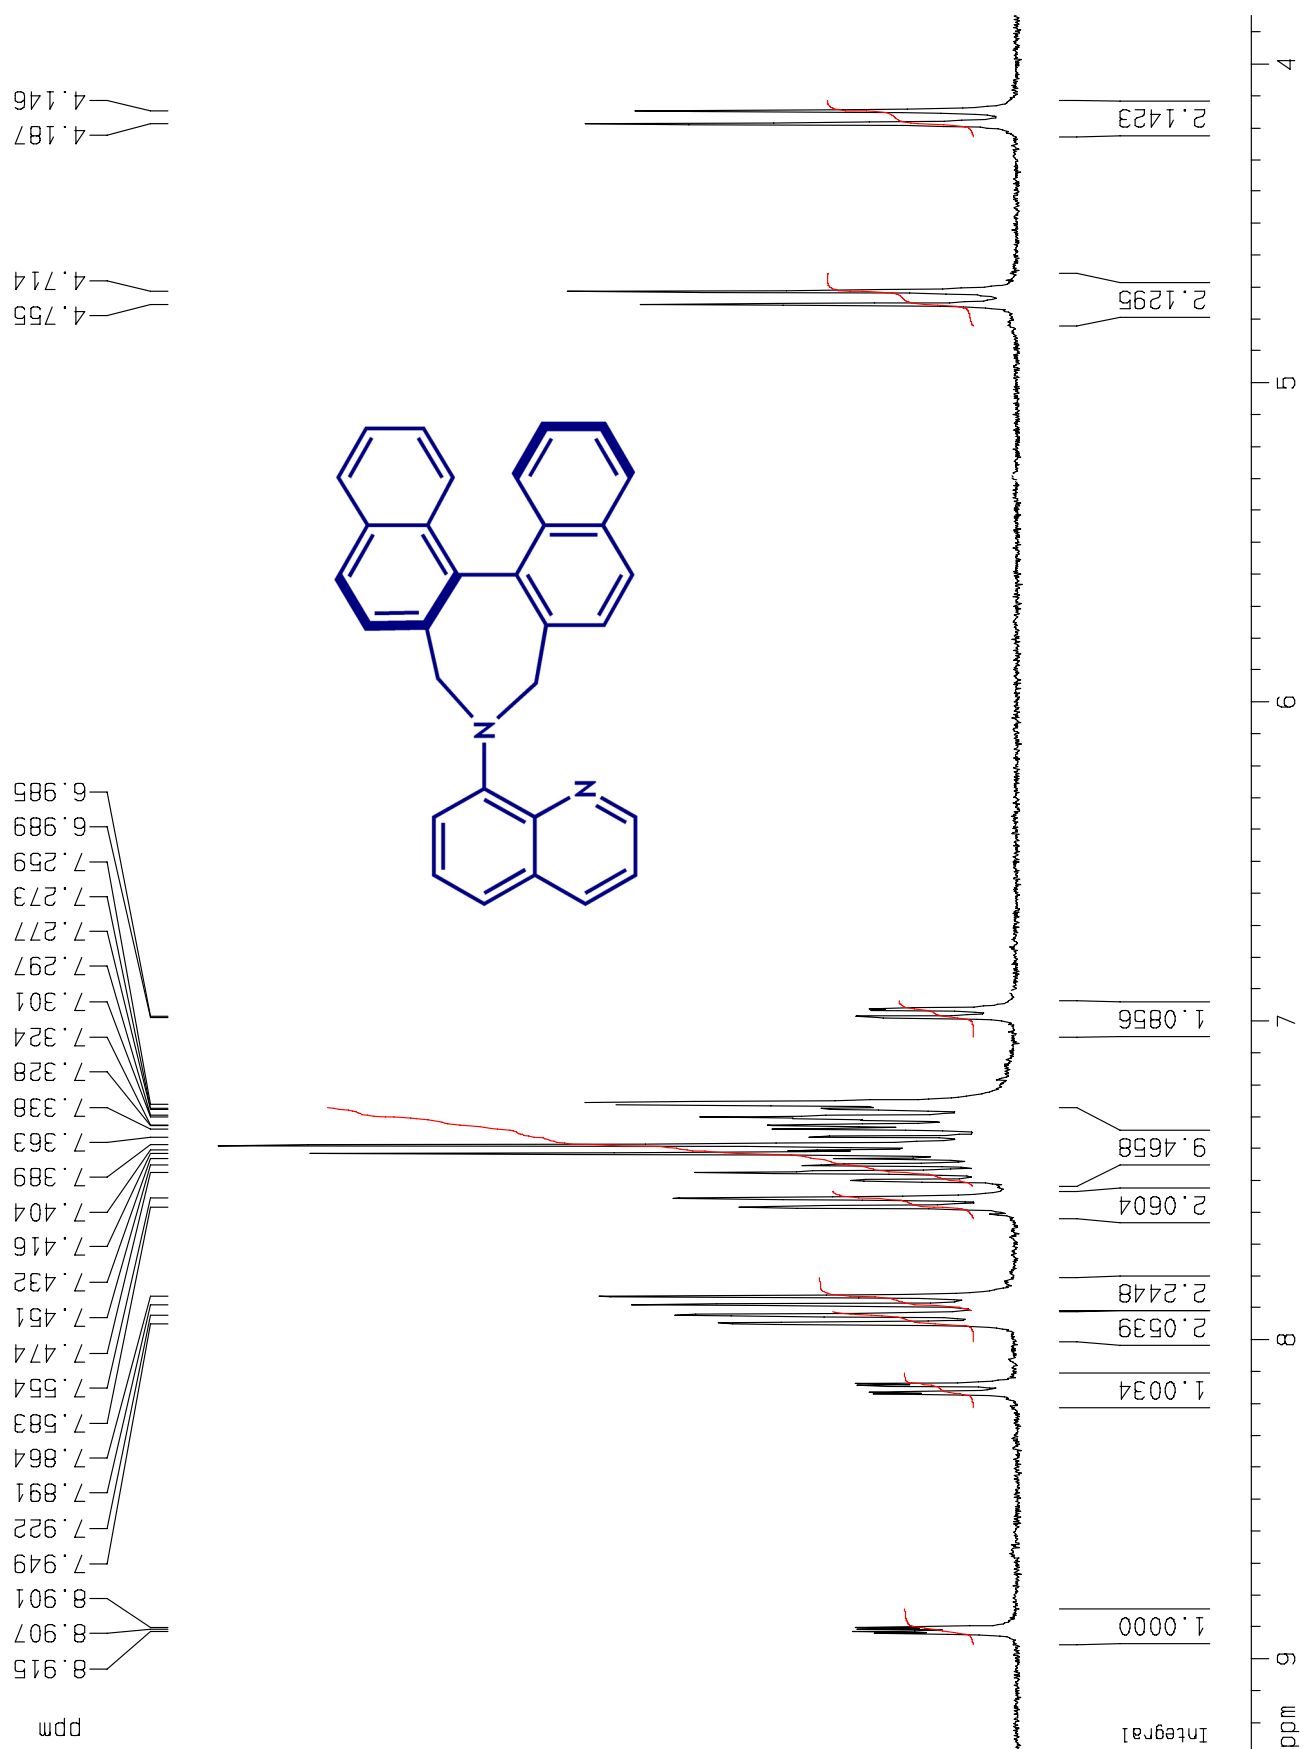

<sup>1</sup>H NMR (300 MHz, CDCl<sub>3</sub>) Spectrum of (S<sub>a</sub>)-2

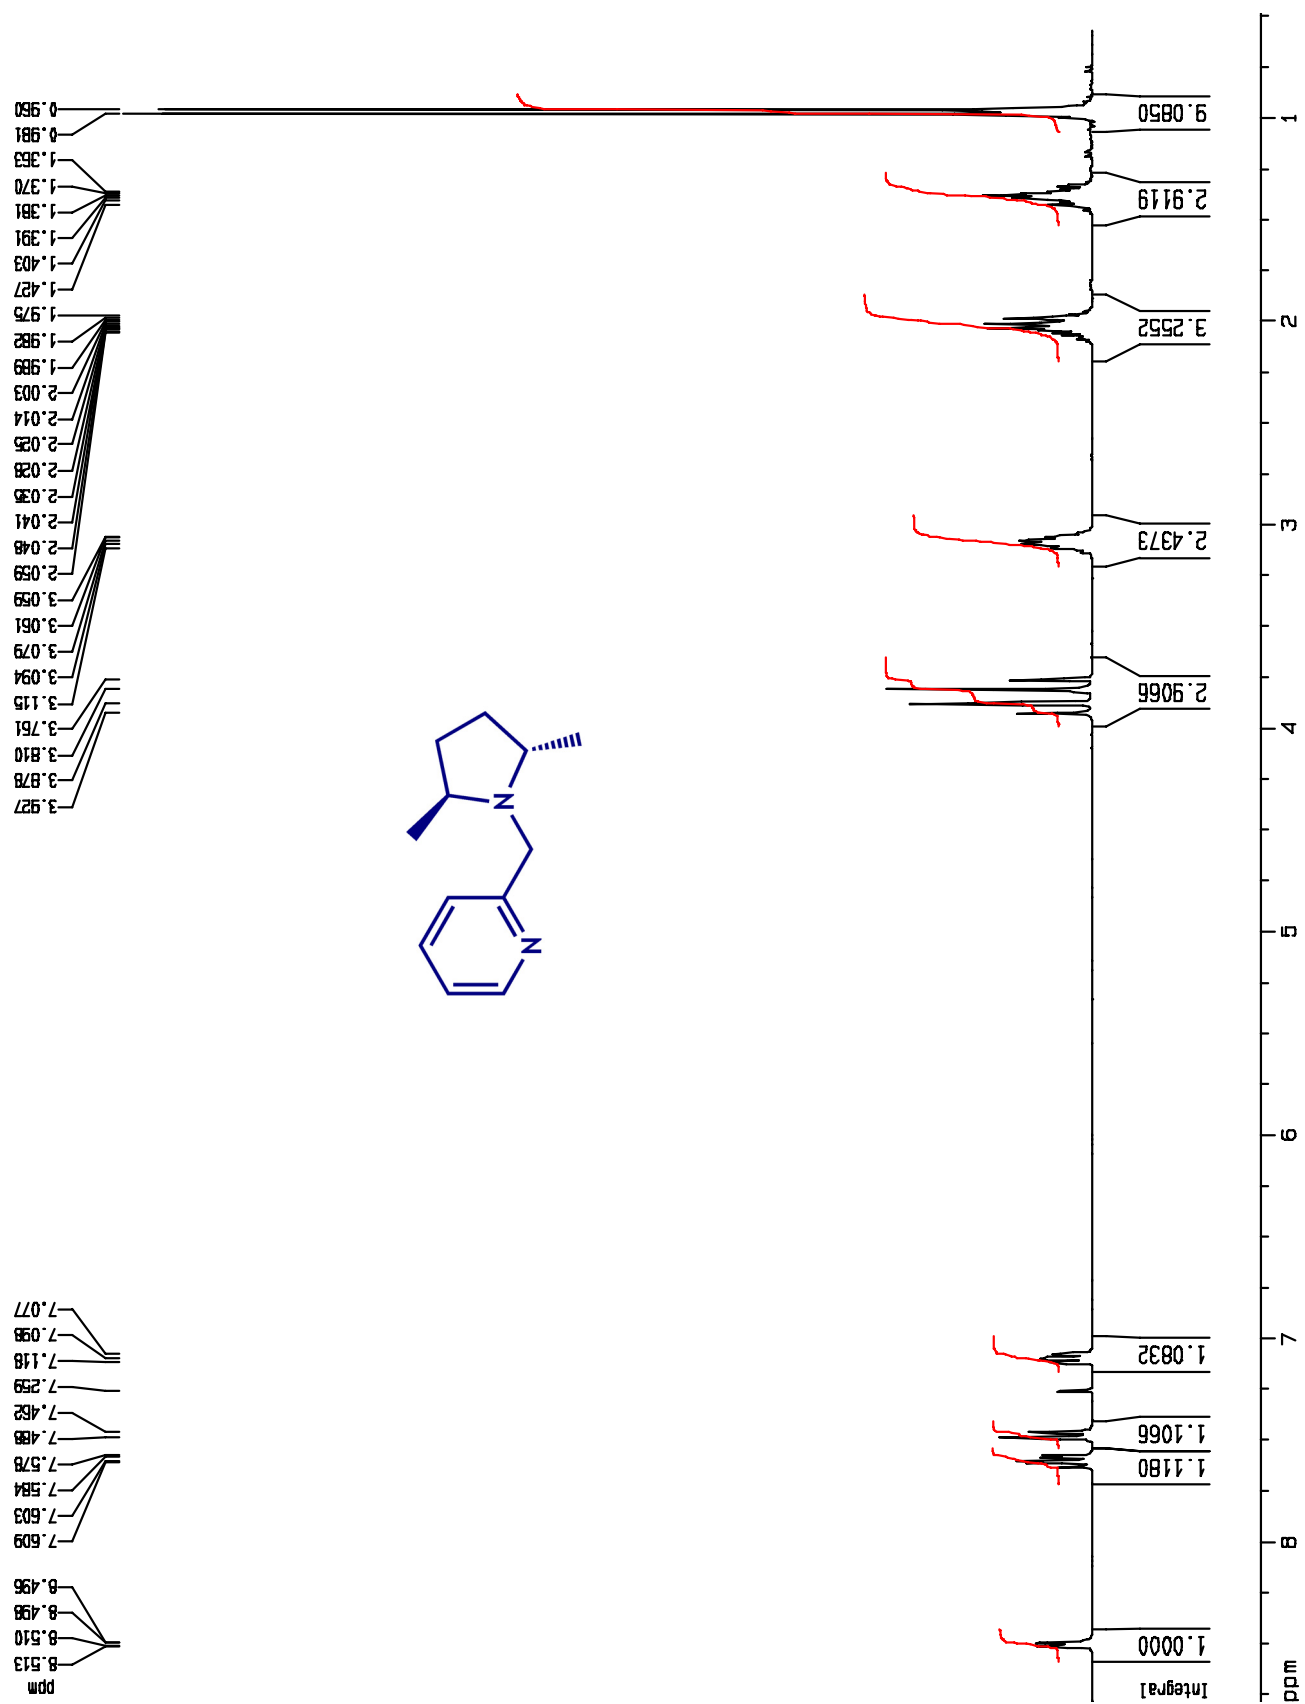

$^1\text{H}$  NMR (300 MHz,  $\text{CDCl}_3$ ) Spectrum of (S,S)-3

$^1\text{H}$  NMR (300 MHz,  $\text{CDCl}_3$ ) Spectrum of (S,S)-4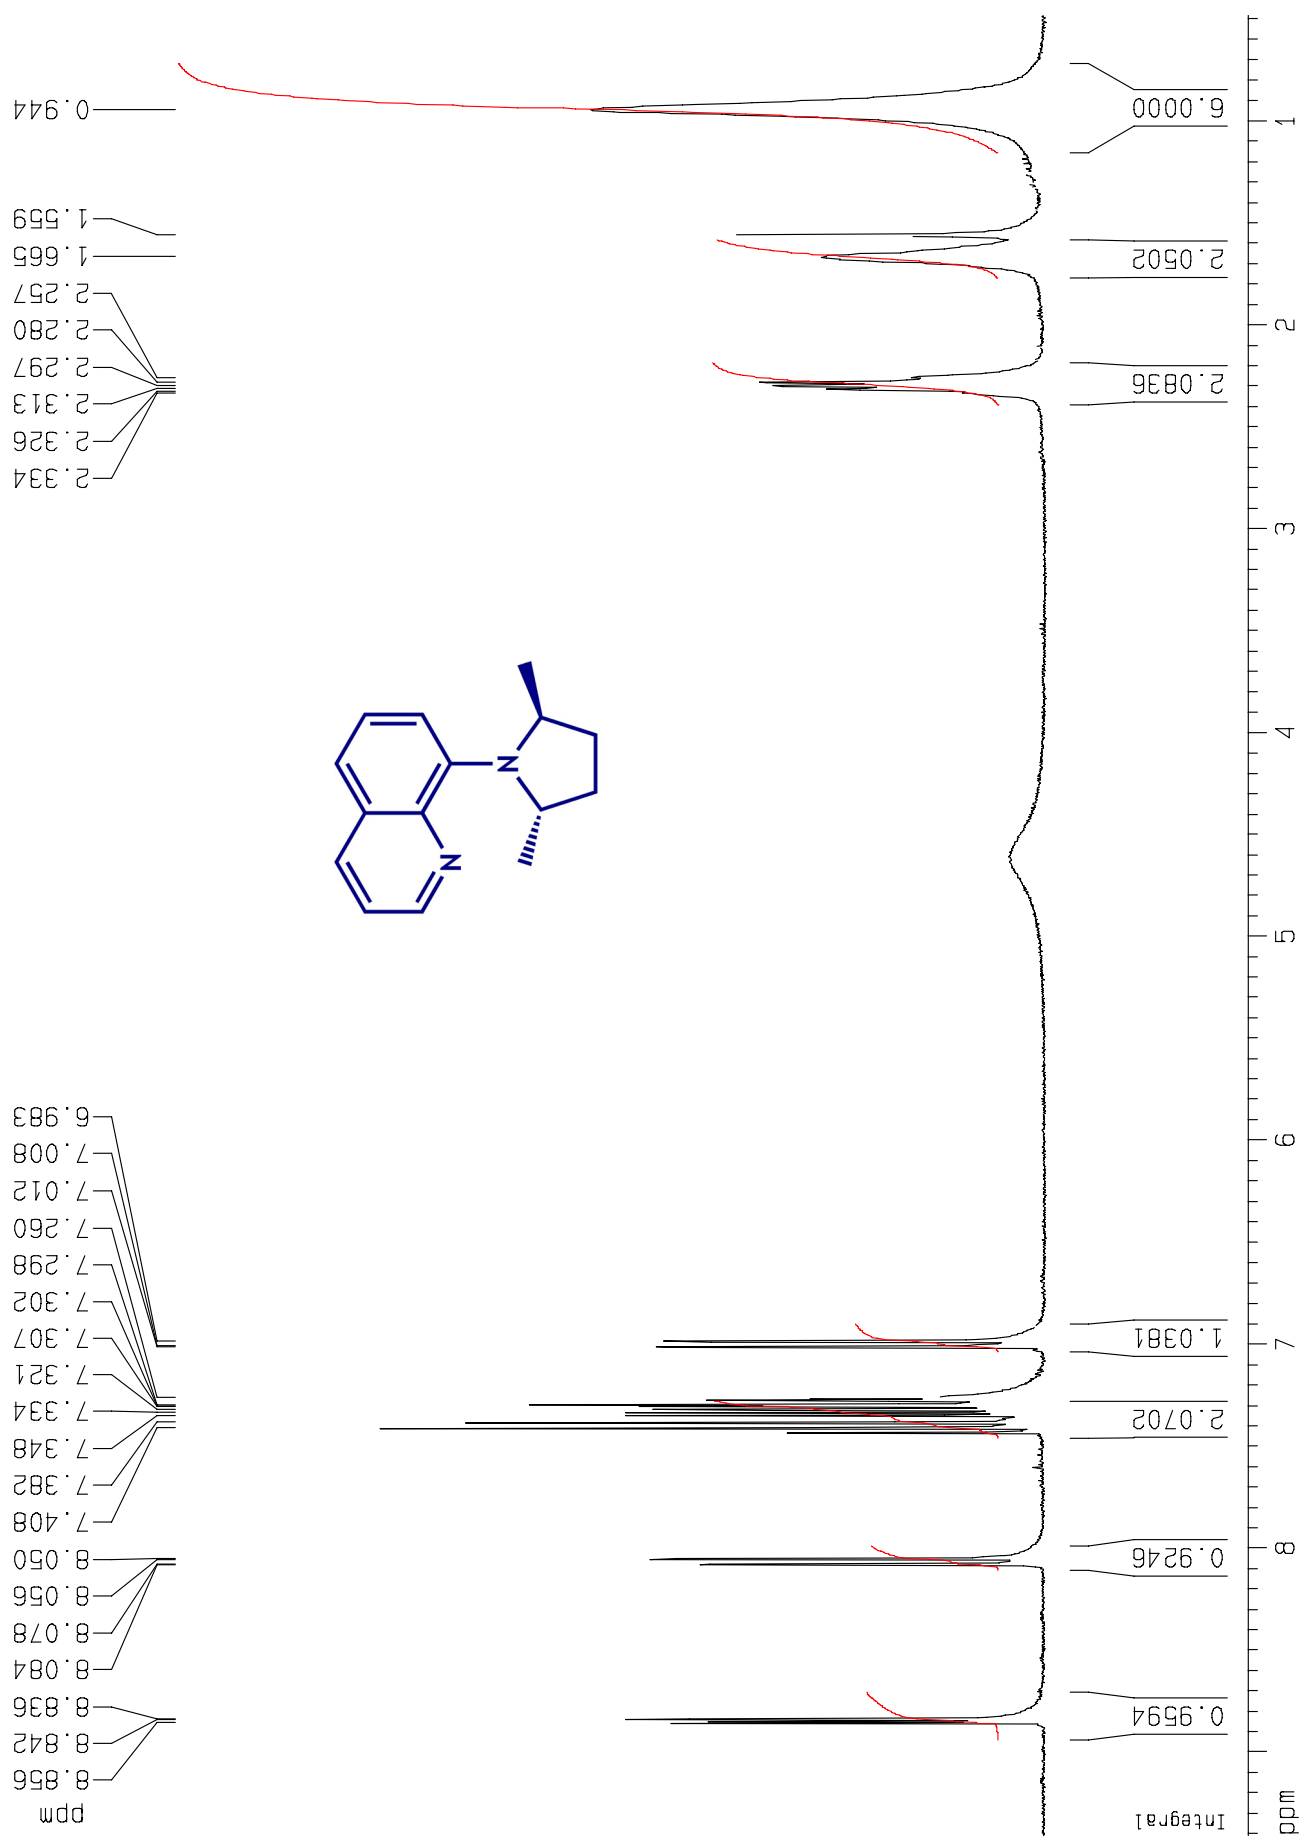

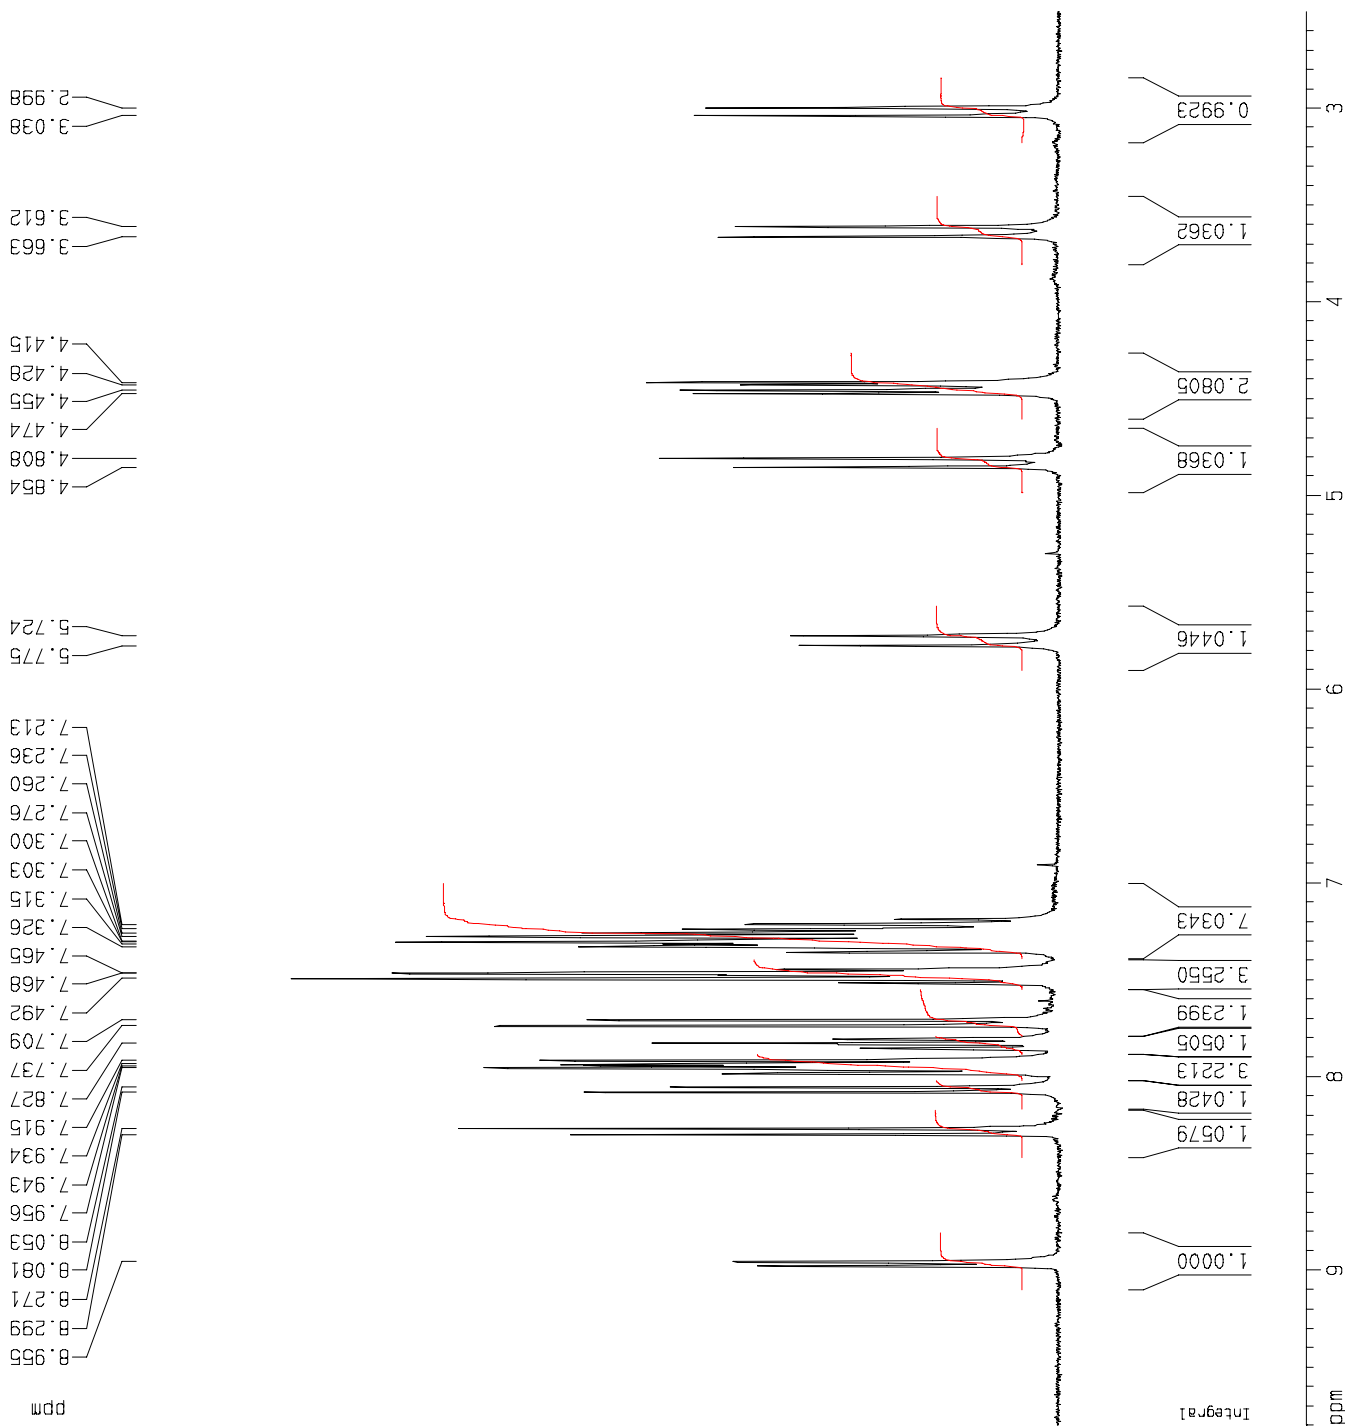

$^1\text{H}$  NMR (300 MHz,  $\text{CDCl}_3$ ) Spectrum of  $[\text{Pd}(\text{S}_a\text{-1})\text{Cl}_2]$  (**5**).



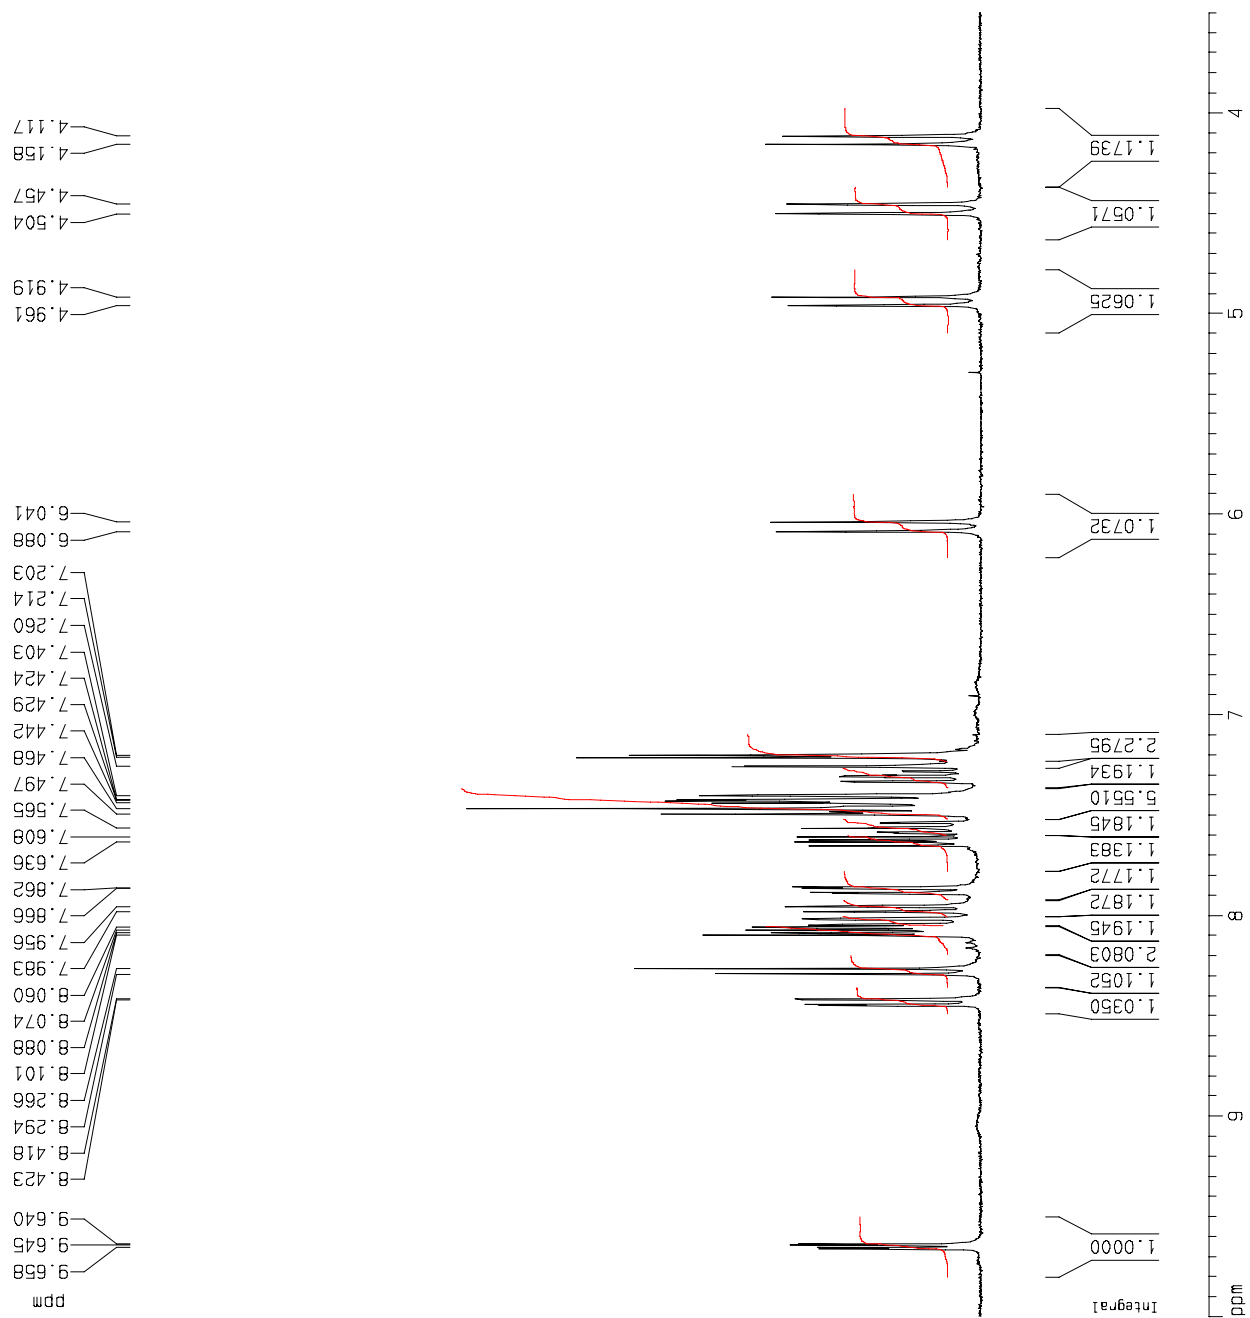

$^1\text{H}$  NMR (300 MHz,  $\text{CDCl}_3$ ) Spectrum of  $[\text{Pd}(\text{S}_a\text{-2})\text{Cl}_2]$  (6)

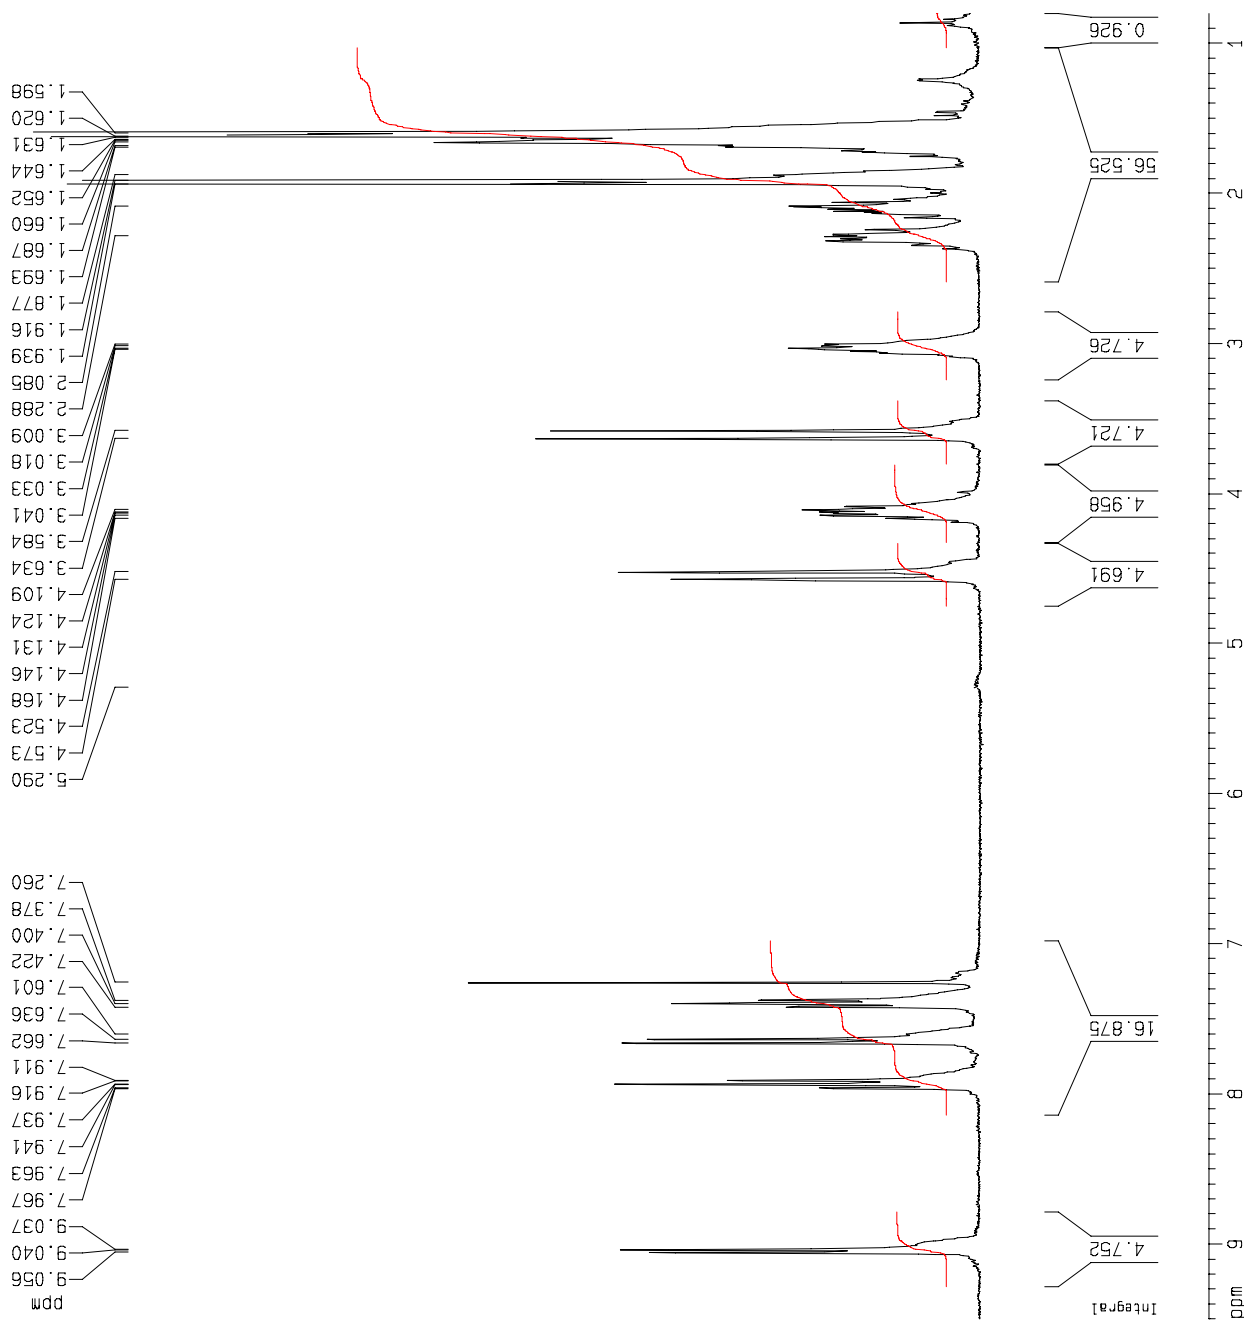

$^1\text{H}$  NMR (300 MHz,  $\text{CDCl}_3$ ) Spectrum of  $[\text{Pd}(\text{S,S-3})\text{Cl}_2]$  (7)

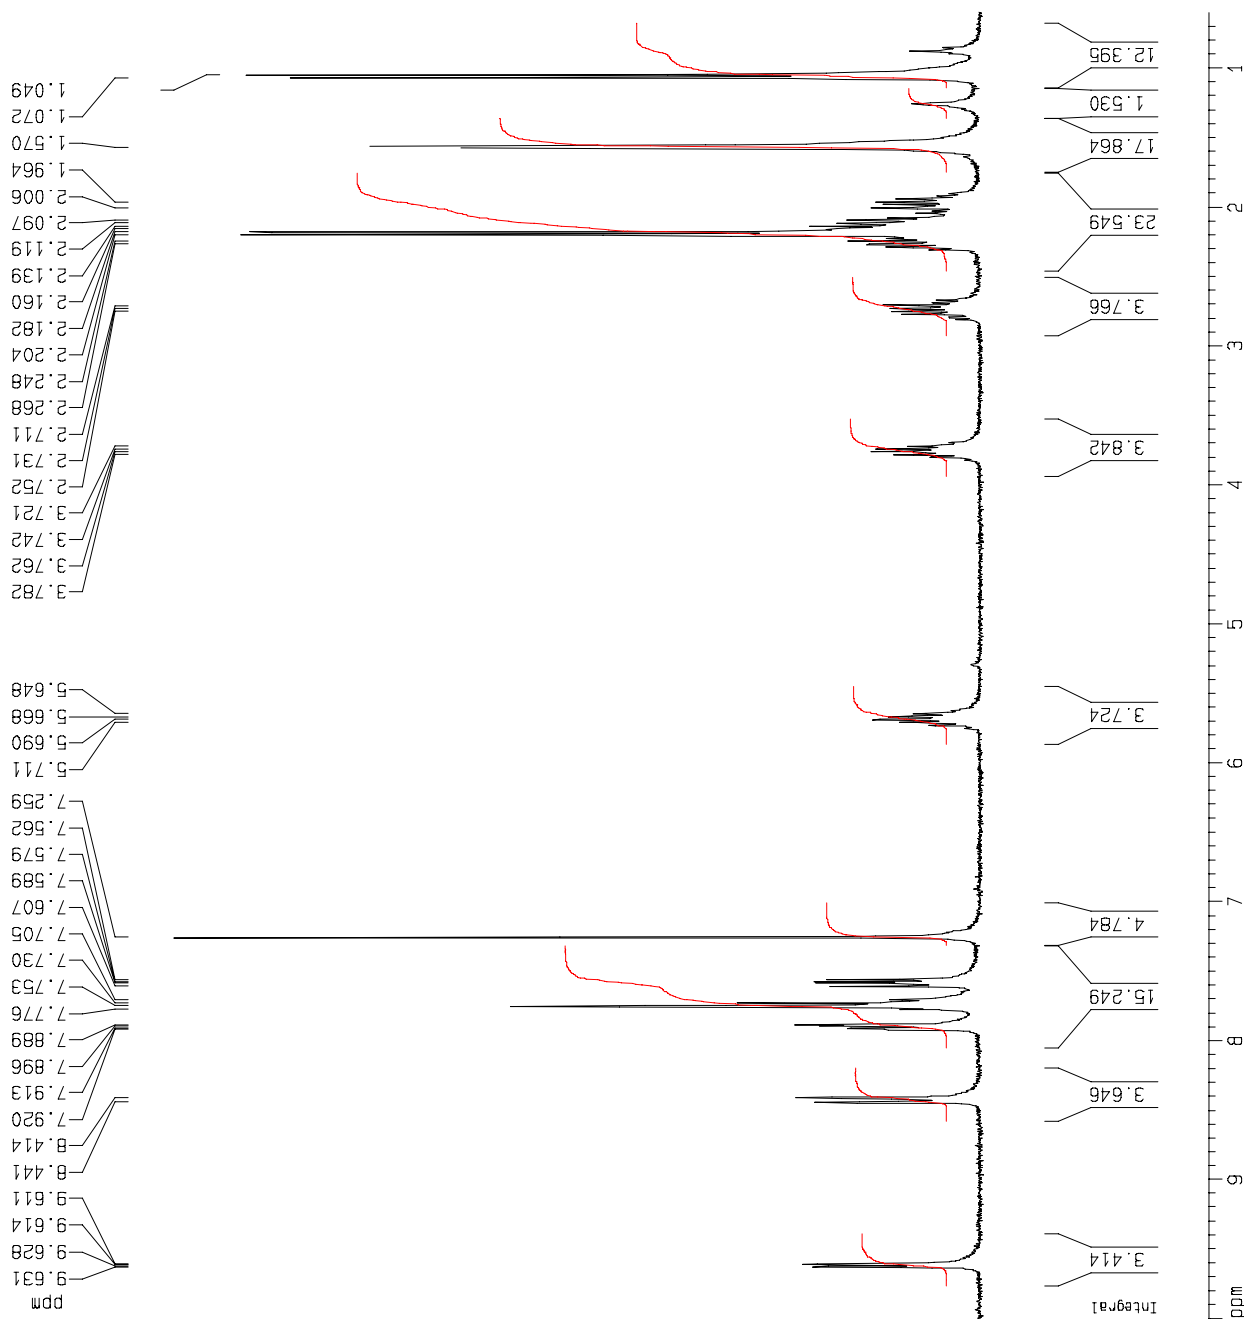

$^1\text{H}$  NMR (300 MHz,  $\text{CDCl}_3$ ) Spectrum of  $[\text{Pd}(\text{S,S-4})\text{Cl}_2]$  (**8**)

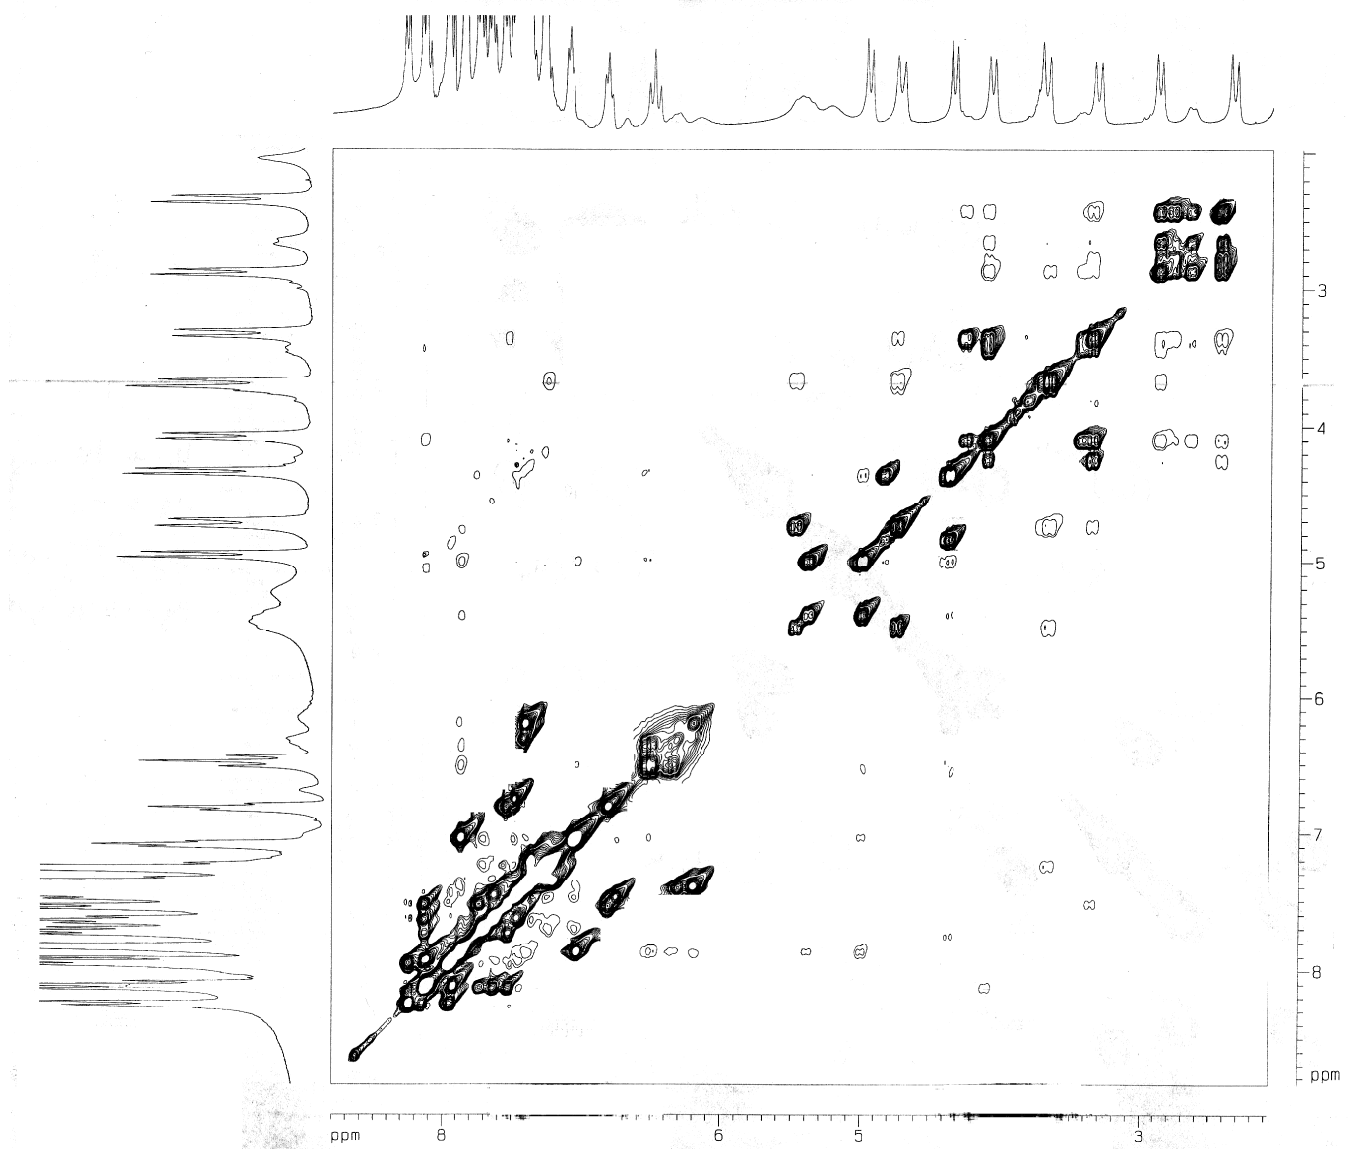

NOESY NMR (300 MHz,  $\text{CDCl}_3$ ) Spectrum of  $[\text{Pd}(\eta^3\text{-PhCHCHCHPh})(\text{Sa-1})]\text{CF}_3\text{SO}_3$  (**9**).

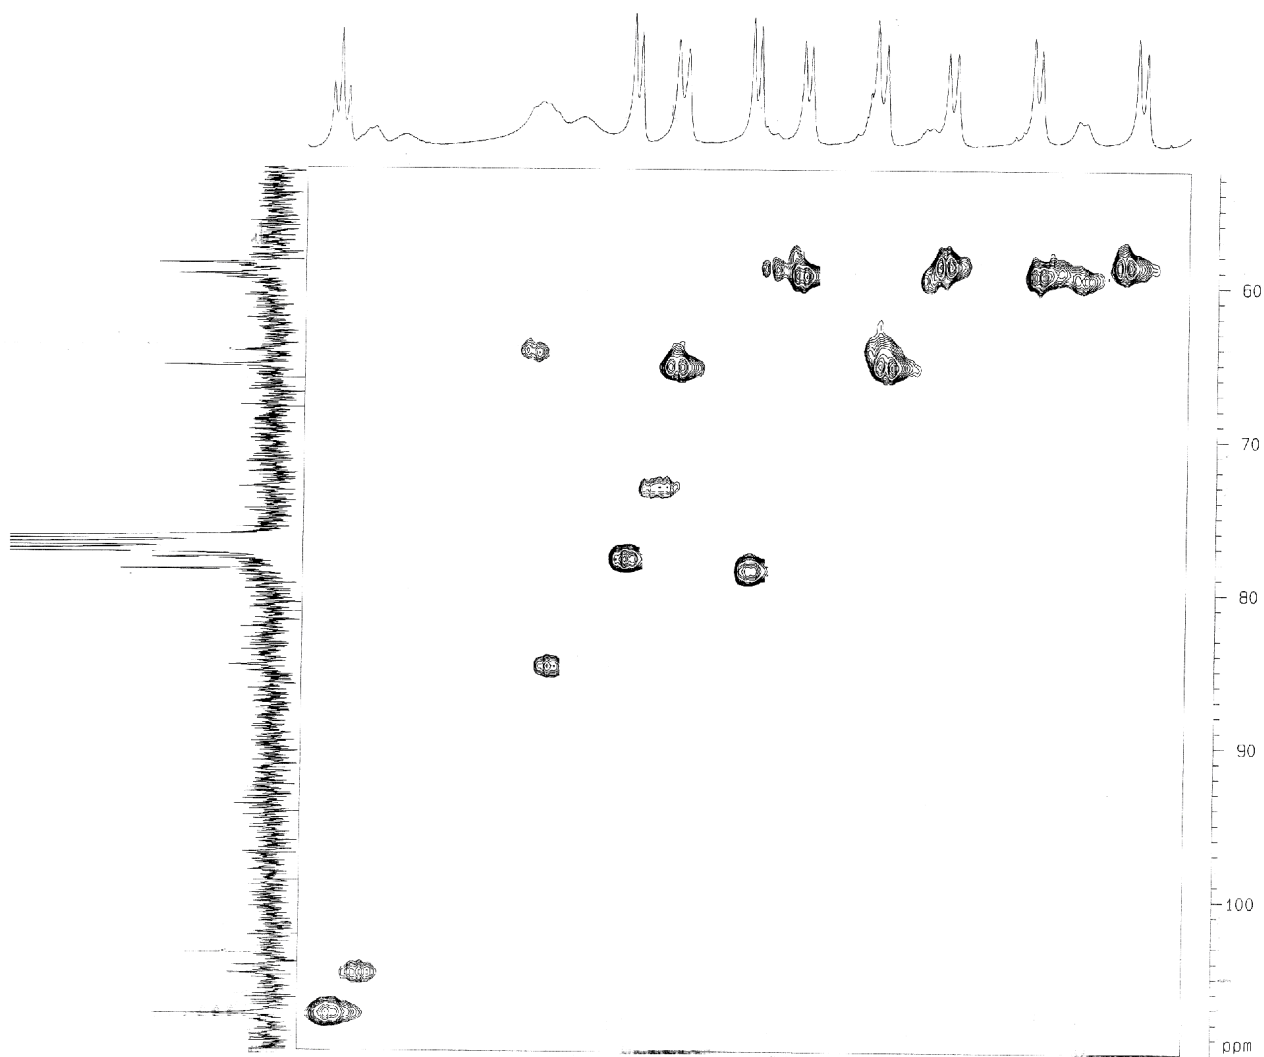

HMQC NMR (300 MHz,  $\text{CDCl}_3$ ) Allylic Section Spectrum of  $[\text{Pd}(\eta^3\text{-PhCHCHCHPh})(\text{S}_a\text{-1})]\text{CF}_3\text{SO}_3$  (**9**)



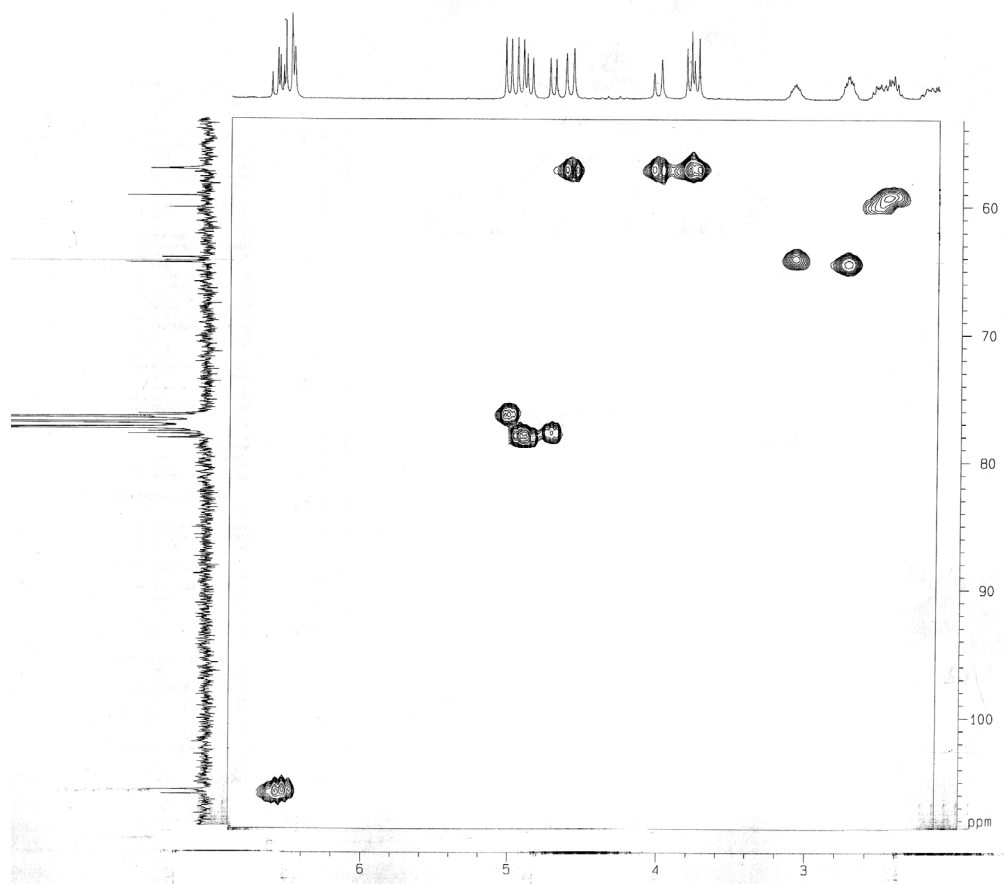

HMQC NMR (300 MHz, CDCl<sub>3</sub>) Allylic Section Spectrum of [Pd(η<sup>3</sup>-PhCHCHCHPh)(S,S-3)]CF<sub>3</sub>SO<sub>3</sub> (**10**)

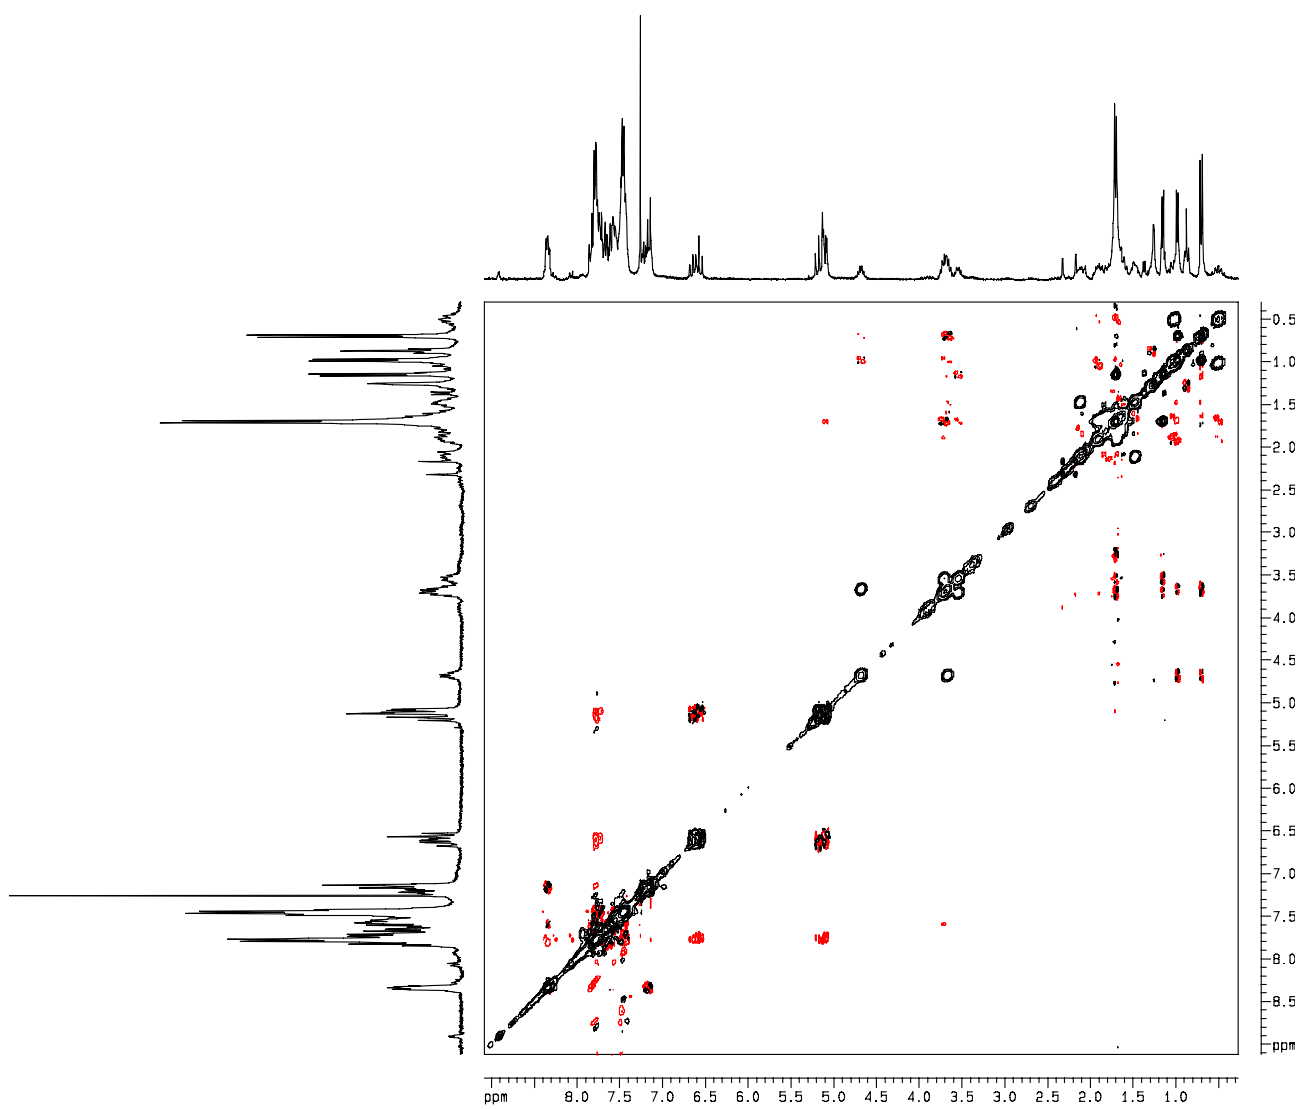

NOESY NMR (300 MHz,  $\text{CDCl}_3$ ) Spectrum of  $[\text{Pd}(\eta^3\text{-PhCHCHCHPh})(\text{S,S-4})]\text{CF}_3\text{SO}_3$  (**11**).



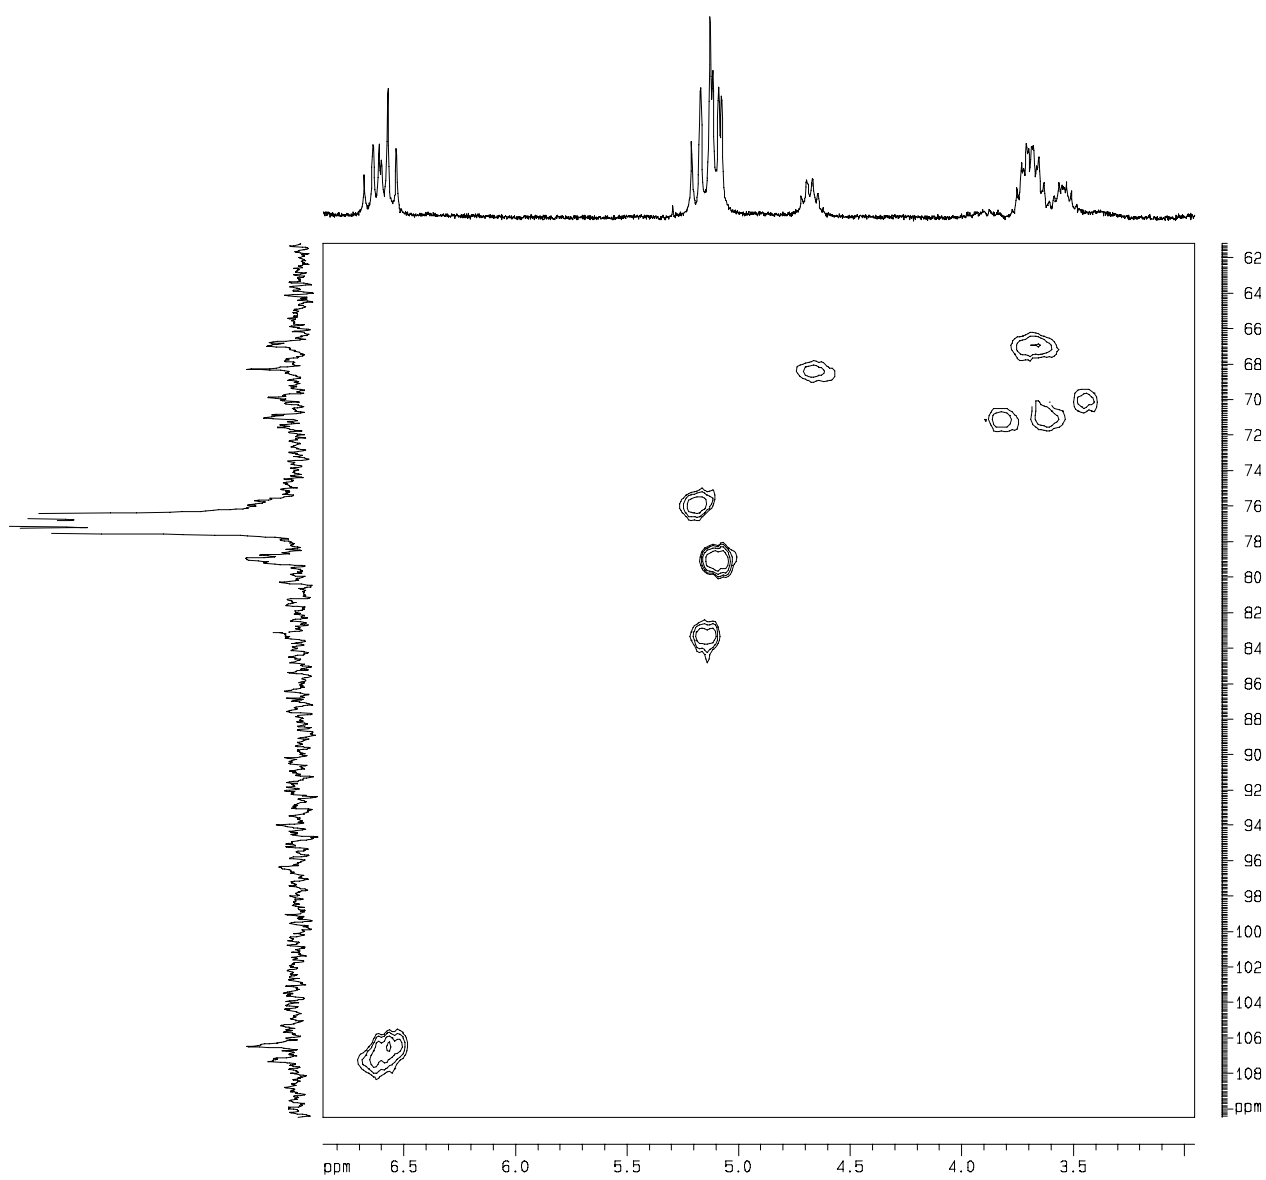

HMQC NMR (300 MHz,  $\text{CDCl}_3$ ) Allylic Section Spectrum of  $[\text{Pd}(\eta^3\text{-PhCHCHCHPh})(\text{S,S-4})]\text{CF}_3\text{SO}_3$  (**11**)

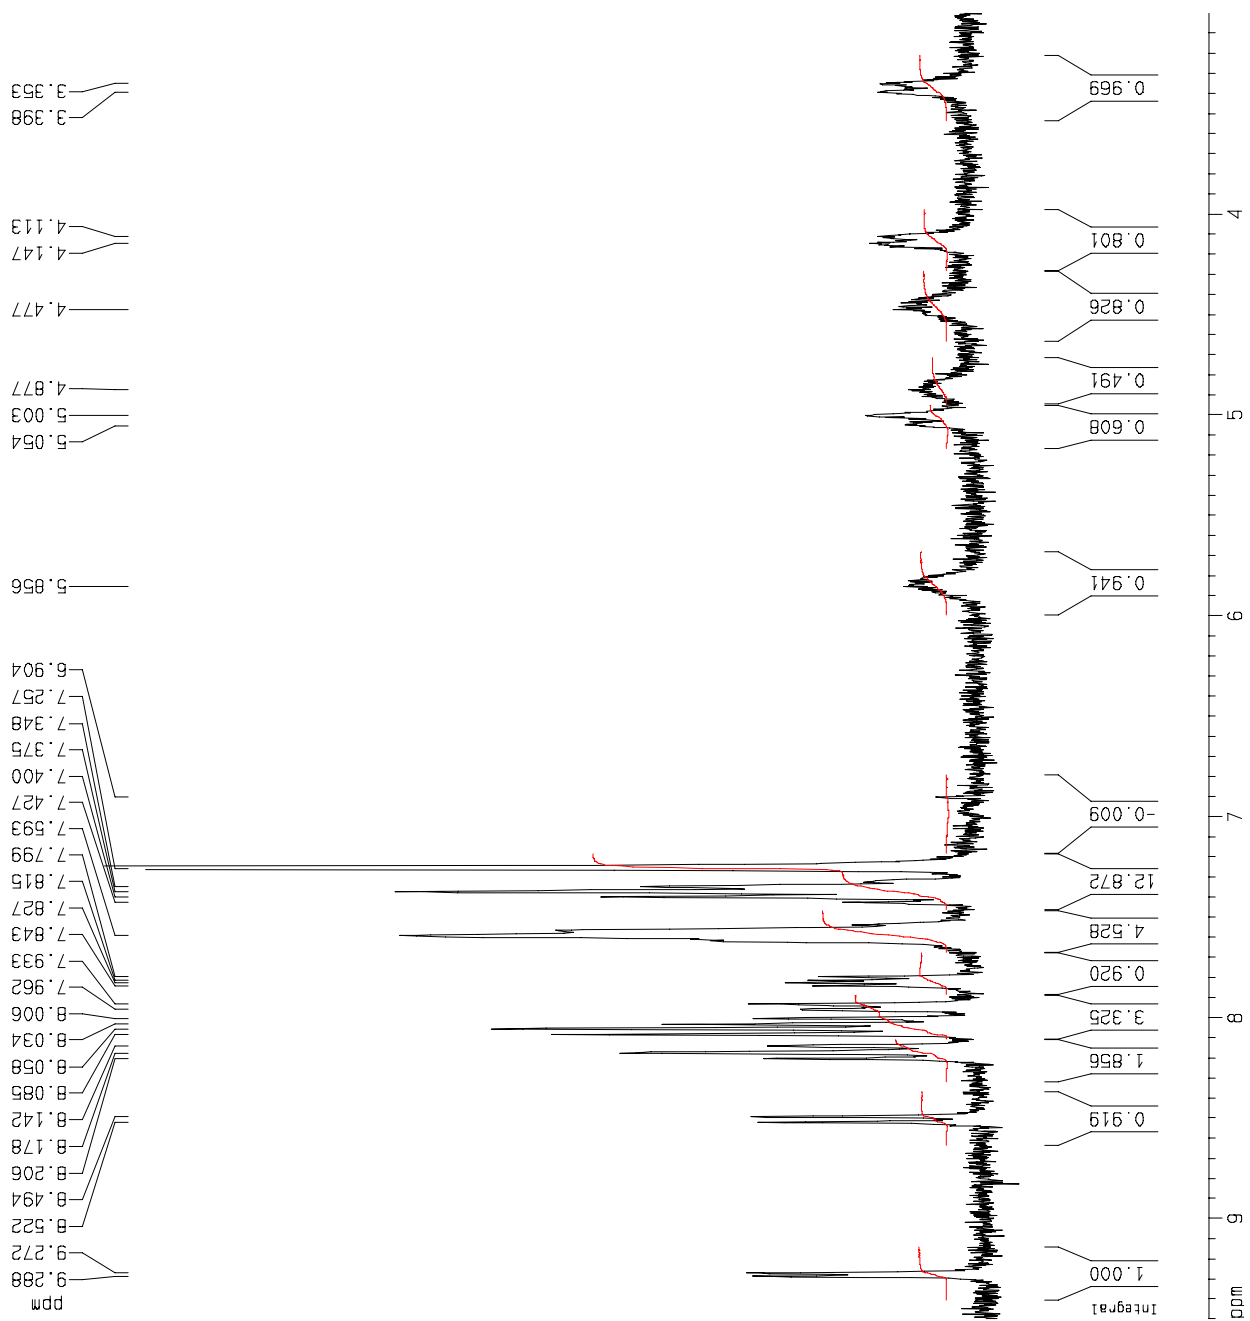

$^1\text{H}$  NMR (300 MHz,  $\text{CDCl}_3$ ) Spectrum of  $[\text{Pd}(\eta^3\text{-H}_2\text{CCHCH}_2)(\text{S}_a\text{-2})]\text{CF}_3\text{SO}_3$  (**12**).
